# Supplementary material for: Golgi Reassembly Stacking Protein 2 Modulates Myometrial Contractility during Labor by Affecting ATP Production
Source: MDPI journal article supplement (doi:10.3390/ijms241210116), 2023-06-14
Supplement: s1 [file s1]

Figure S1

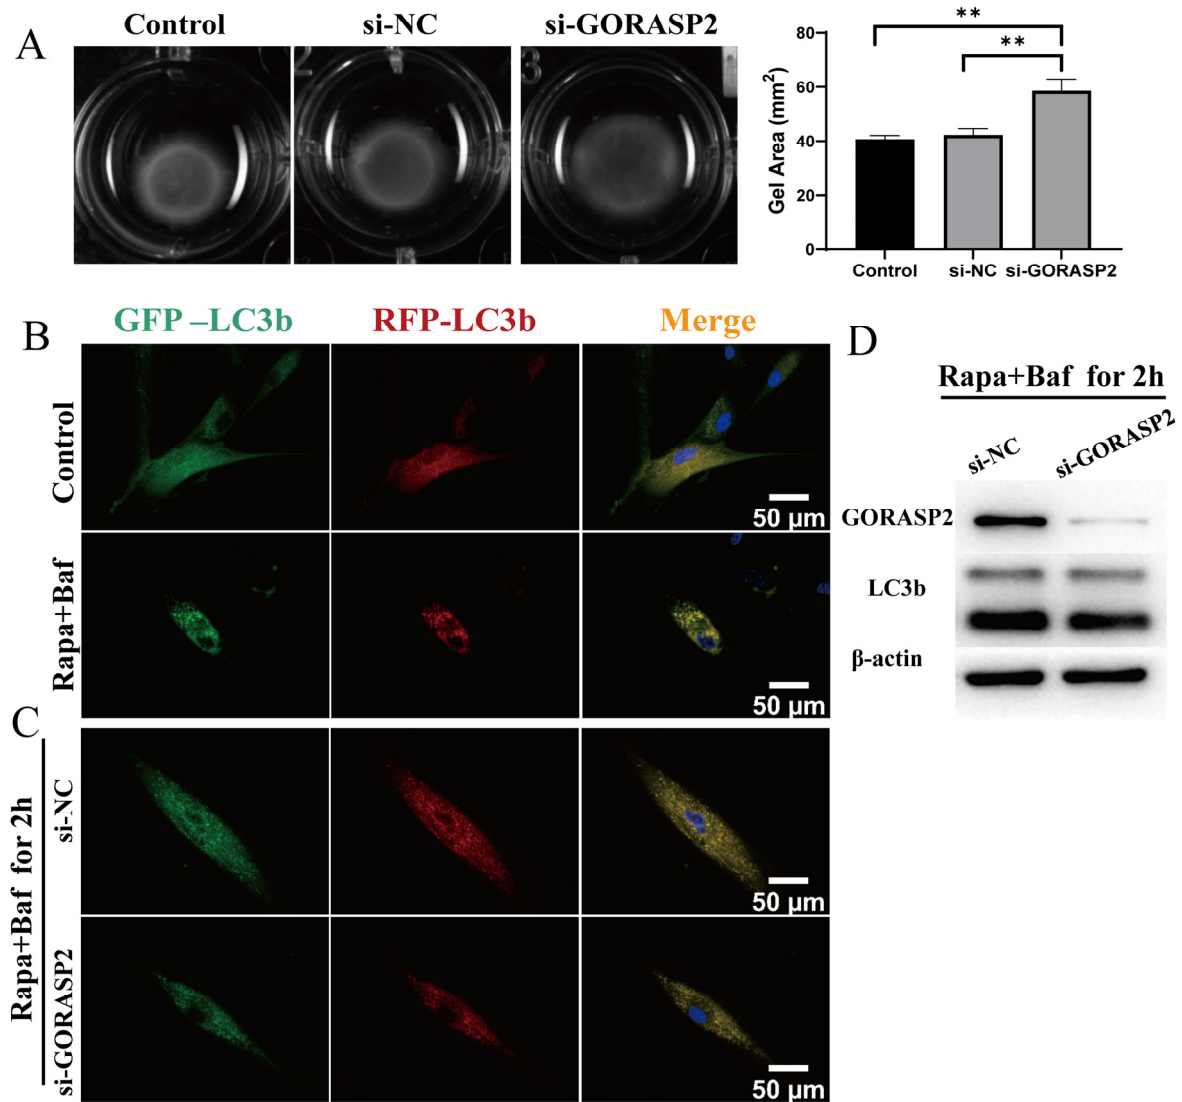

**Figure S1. GORASP2 was involved in the contractile function of hMSMCs, but GORASP2 deficiency didn't affect the autophagy initiation of hMSMCs.**

(A) Contractility assessment of hMSMCs transfected with si-NC or si-GORASP2 for 48 h, treated with 10 nM oxytocin under normoxia for 2 h, N = 3. (B) hMSMCs were transfected with RFP-GFP-LC3 adenovirus for 2 h, treated with growth medium (Control) or Rapamycin+Bafal for 2 h, and detected the autophagy flux, N = 3. (C) hMSMCs were transfected with si-NC or si-GORASP2 for 48 h, following transfected with RFP-GFP-LC3 adenovirus for 2 h, then treated with Rapamycin+Bafal for 2 h, and detected the autophagy flux, N = 3. (D) Western blot results for GORASP2 and LC3b in hMSMCs treated with Rapamycin+Bafal for 2 h after transfected with si-NC or si-GORASP2 for 72 h, N = 3. \*\*P < 0.01.
